# Supplementary material for: Emergence of a Distinct Picobirnavirus Genotype Circulating in Patients Hospitalized with Acute Respiratory Illness
Source: MDPI journal article supplement (doi:10.3390/v13122534), 2021-12-17
Supplement: s1 [file s1]

## Online Supplemental Appendix

### A DISTINCT GENOTYPE OF PICOBIRNAVIRUSES CIRCULATING IN PATIENTS HOSPITALIZED WITH ACUTE RESPIRATORY ILLNESS

Michael G. Berg, Kenn Forberg, Lester Perez, Ka-Cheung Luk, Todd V. Meyer, and Gavin A. Cloherty

#### Primer and Probe sequences

##### Capsid

Forward Primer: CAF1151: 5'-CACCTACTCCAGATGATGTC-3'

Reverse Primer: CAR1229: 5'-CTGTACCCATAGCAGTGAATA

Probe: CAP1186: 5' FAM-TTAGCTGTGGCATTAGAACCAGGCGC-BHQ1 3'

##### RDRP

Forward Primers:

(1) PVFP1: 5'-TGGCGIGGICARGAAGG-3'

(2) PVFP2: 5'-TGGAGAGGICAIGARGG-3'

(3) PVFP3: 5'-TGGCGIGGICARGAGGG-3'

Reverse Primers:

(1) PVRP1: 5'-CCATICIAAYCCAIGCAGG-3'

(2) PVRP2: 5'-CIAWGCIAACCCAIGCTGG-3'

(3) KMRP: 5'-CAIICCGACCCAWGCTGG-3'

(4) GQRP: 5'-ATAAACCAATCCATGGCGCTAT-3'

(5) MGRP: 5'-ACCICGTCATTRCIIWCCCA-3'

Probes:

(1) PVPROF1: 5' FAM-CGTIAARCARIGIGTIGTITGGATGTTYCC-BHQ1 3'

(2) PVPROF2: 5' FAM-CGTIAARCARAGIGTIGTITGGATGTTCCC-BHQ1 3'

(3) PVPROF3: 5' FAM-CGTIAARCAGCGIGTIGTITGGATGTTYCC-BHQ1 3'

(4) MRNRPRO: 5' Cy5-CGTTGCGCTGTTTCGATTAGAGGTTGG-BHQ2 3'

(5) KMRPRO: 5' Cy3-TGTAGCATATCCATAAACGGCTGRTAGAC-BHQ2 3'

## PCR reactions and cycling conditions

Below is a detailed description of the PBV Capsid qPCR reaction recipe and cycling conditions:

|                                      |                    |           |          |
|--------------------------------------|--------------------|-----------|----------|
| Water                                | 11.45 µl           |           |          |
| 2X RT-PCR Buffer                     | 25.0 µl (1X)       |           |          |
| CAF1151 (100 µM in TE, pH 8.0)       | 0.2 µl             | } 0.55 µl | (0.4 µM) |
| CAR1229 (100 µM in TE, pH 8.0)       | 0.2 µl             |           | (0.4 µM) |
| CAP1186 (FAM) (100 µM in TE, pH 8.0) | 0.15 µl            |           | (0.3 µM) |
| 50 mM MgCl <sub>2</sub>              | 1.0 µl (1 mM)      |           |          |
| 25 x RT-PCR Enzyme Mix               | 2.0 µl (1X)        |           |          |
|                                      | 40 µl              |           |          |
| RNA                                  | 10 µl              |           |          |
|                                      | 50 µl per reaction |           |          |

### Real-time PCR Cycling Conditions

| Stage | Cycle | Temperature | Time                                 |
|-------|-------|-------------|--------------------------------------|
| 1     | 1     | 50 C        | 30 min                               |
| 2     | 1     | 95 C        | 10 min                               |
| 3     | 45    | 95 C        | 30 sec                               |
|       |       | 62 C        | 30 sec                               |
|       |       | 55 C        | 90 sec (signals read in last 30 sec) |

Below is a detailed description of the PBV RDRP qPCR reaction recipe and cycling conditions:

|                                      |                    |           |          |
|--------------------------------------|--------------------|-----------|----------|
| Water                                | 9.65 µl            |           |          |
| 2 x RT-PCR Buffer                    | 25.0 µl (1 x)      |           |          |
| PVFP1 (100 µM in TE, pH8.0)          | 0.2 µl             | } 2.05 µl | (0.4 µM) |
| PVFP2 (100 µM in TE, pH 8.0)         | 0.2 µl             |           | (0.4 µM) |
| PVFP3 (100 µM in TE, pH 8.0)         | 0.2 µl             |           | (0.4 µM) |
| PVRP1 (100 µM in TE, pH 8.0)         | 0.2 µl             |           | (0.4 µM) |
| PVRP2 (100 µM in TE, pH 8.0)         | 0.2 µl             |           | (0.4 µM) |
| KMRP (100 µM in TE, pH 8.0)          | 0.2 µl             |           | (0.4 µM) |
| GQRP (100 µM in TE, pH 8.0)          | 0.2 µl             |           | (0.4 µM) |
| MGRP (100 µM in TE, pH 8.0)          | 0.2 µl             |           | (0.4 µM) |
| PVPROF1 (FAM) (100 µM in TE, pH 8.0) | 0.15 µl            | } 0.3 µl  | (0.3 µM) |
| PVPROF2 (FAM) (100 µM in TE, pH 8.0) | 0.15 µl            |           | (0.3 µM) |
| PVPROF3 (FAM) (100 µM in TE, pH 8.0) | 0.15 µl            |           | (0.3 µM) |
| MRNRPRO (Cy5) (100 µM in TE, pH 7.0) | 0.15 µl            |           | (0.3 µM) |
| KMRPRO (Cy3) (100 µM in TE, pH 7.0)  | 0.15 µl            |           | (0.3 µM) |
| 50 mM MgCl <sub>2</sub>              | 1.0 µl (1 mM)      |           |          |
| 25 x RT-PCR Enzyme Mix               | 2.0 µl (1 x)       |           |          |
|                                      | 40 µl              |           |          |
| RNA                                  | 10 µl              |           |          |
|                                      | 50 µl per reaction |           |          |

### Real-time PCR Cycling Conditions

| Stage | Cycle | Temperature | Time                                 |
|-------|-------|-------------|--------------------------------------|
| 1     | 1     | 50 C        | 30 min                               |
| 2     | 1     | 95 C        | 10 min                               |
| 3     | 45    | 95 C        | 30 sec                               |
|       |       | 62 C        | 30 sec                               |
|       |       | 55 C        | 90 sec (read signals in last 30 sec) |

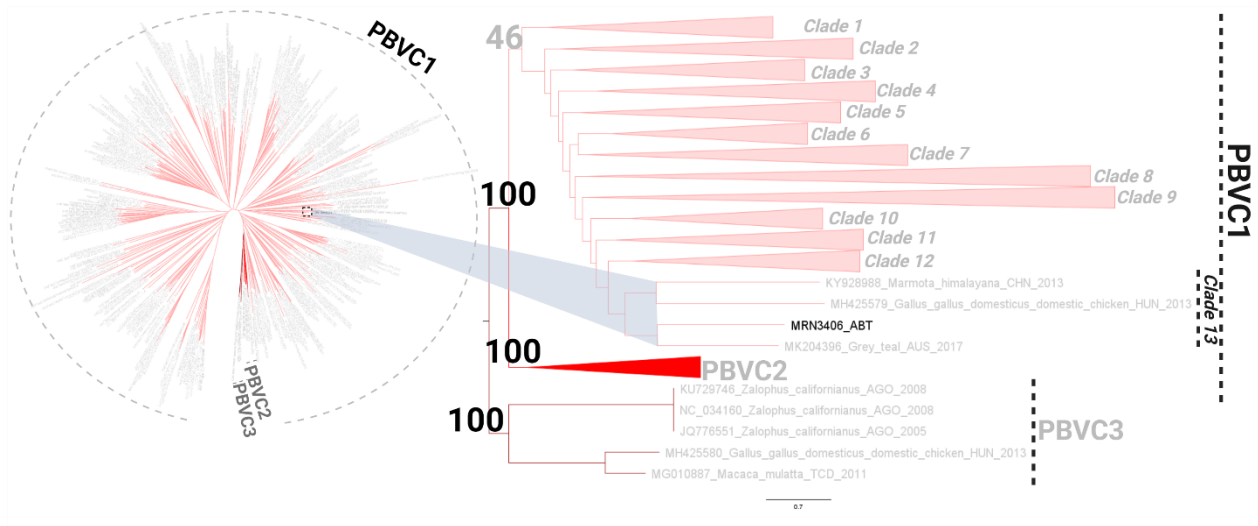

**Supplemental Figure S1.** Maximum-Likelihood phylogenetic radial tree (left) of 422 PBV capsid sequences retrieved from GenBank along with the index case. Species PBVC1 has been expanded, with clades therein collapsed for visualization. The MRN3406 ABT index strain capsid branches within clade 13 of species-PBVC1 along with MK204396, a grey teal duck from Australia.

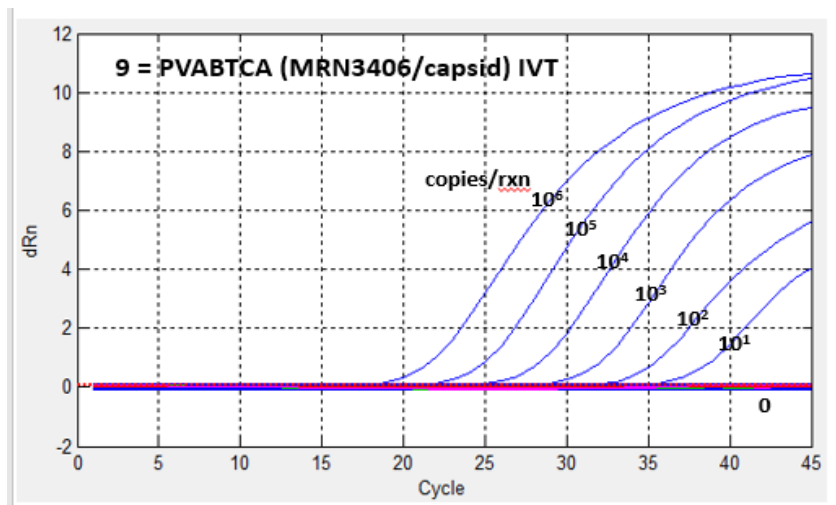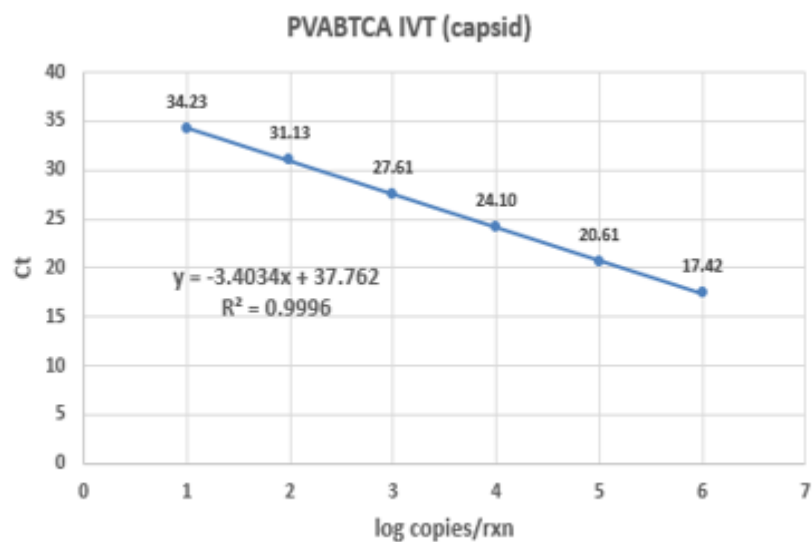

**Supplemental Figure S2** (top) For detection of the ABT3406 capsid, *in vitro* transcript PVABTCA was resuspended in water at 10<sup>1</sup>-10<sup>6</sup> copies/10  $\mu$ l. Only one probe labeled with FAM detects capsid amplicons. (bottom) Linear regression analysis comparing Ct vs log copies/reaction.

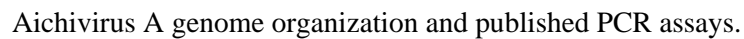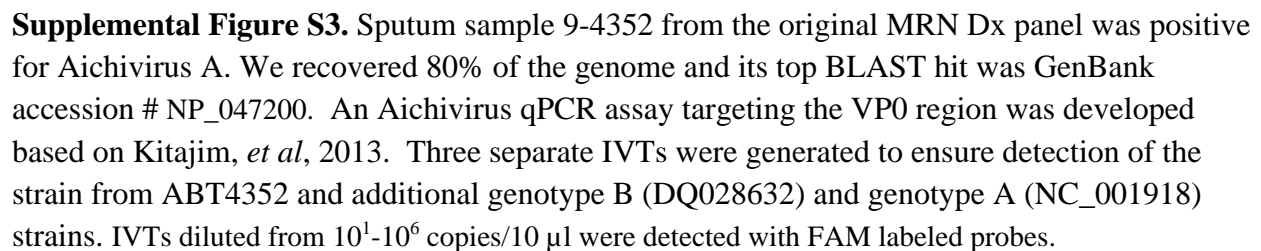

| GenBank ID | Host                           | Country code | Years |
|------------|--------------------------------|--------------|-------|
| AB186898   | NA                             | NA           | NA    |
| AB517731   | NA                             | IND          | 2007  |
| AB517732   | NA                             | IND          | 2007  |
| AB517733   | NA                             | IND          | 2007  |
| AB517734   | NA                             | IND          | 2007  |
| AB517735   | NA                             | IND          | 2007  |
| AB517736   | NA                             | IND          | 2007  |
| AB517737   | NA                             | IND          | 2007  |
| AB517738   | NA                             | IND          | 2007  |
| AB517739   | NA                             | IND          | 2008  |
| AB828072   | <i>Bos taurus</i>              | CHN          | NA    |
| AF246939   | NA                             | TCD          | NA    |
| AF246940   | NA                             | NA           | NA    |
| GQ221268   | <i>Bos indicus</i>             | IND          | 2005  |
| GQ915026   | <i>Homo sapiens</i>            | TCD          | 2004  |
| GQ915029   | <i>Homo sapiens</i>            | TCD          | NA    |
| GU968924   | <i>Homo sapiens</i>            | NLD          | 2007  |
| HM070240   | <i>Sus scrofa</i>              | CHN          | 2010  |
| JF755419   | <i>Mus musculus</i>            | TCD          | 2008  |
| JF755420   | <i>Microtus pennsylvanicus</i> | TCD          | 2008  |
| JQ710506   | <i>Macaca mulatta</i>          | CHN          | 2002  |
| JQ710507   | <i>Macaca mulatta</i>          | CHN          | 2002  |
| JQ776552   | <i>Zalophus californianus</i>  | AGO          | 2008  |
| KC692366   | <i>Vulpes vulpes</i>           | NLD          | 2012  |
| KF792838   | <i>Felis catus</i>             | PRT          | 2012  |
| KF823810   | <i>Vulpes vulpes</i>           | ESP          | 2013  |
| KF823811   | <i>Vulpes vulpes</i>           | ESP          | 2013  |
| KF861773   | <i>Sus scrofa</i>              | ITA          | 2004  |
| KJ206569   | <i>Homo sapiens</i>            | NLD          | NA    |
| KJ495690   | <i>Meleagris gallopavo</i>     | TCD          | 2011  |
| KJ663814   | <i>Homo sapiens</i>            | TCD          | 2013  |
| KJ663816   | <i>Homo sapiens</i>            | TCD          | 2013  |
| KM254161   | <i>Gallus gallus</i>           | ZAF          | 2013  |
| KM254162   | <i>Gallus gallus</i>           | ZAF          | 2013  |
| KM254164   | <i>Gallus gallus</i>           | ZAF          | 2013  |
| KM285233   | <i>Homo sapiens</i>            | KHM          | 2009  |
| KM285234   | <i>Homo sapiens</i>            | KHM          | 2009  |
| KM573798   | <i>Camelus dromedarius</i>     | ARE          | 2013  |

|          |                                |     |      |
|----------|--------------------------------|-----|------|
| KM573799 | <i>Camelus dromedarius</i>     | ARE | 2013 |
| KM573800 | <i>Camelus dromedarius</i>     | ARE | 2013 |
| KM573801 | <i>Camelus dromedarius</i>     | ARE | 2013 |
| KM573802 | <i>Camelus dromedarius</i>     | ARE | 2013 |
| KM573803 | <i>Camelus dromedarius</i>     | ARE | 2013 |
| KM573804 | <i>Camelus dromedarius</i>     | ARE | 2013 |
| KM573805 | <i>Camelus dromedarius</i>     | ARE | 2013 |
| KM573806 | <i>Camelus dromedarius</i>     | ARE | 2013 |
| KM573807 | <i>Camelus dromedarius</i>     | ARE | 2013 |
| KM573808 | <i>Camelus dromedarius</i>     | ARE | 2013 |
| KM573809 | <i>Camelus dromedarius</i>     | ARE | 2013 |
| KP941111 | <i>Vulpes vulpes</i>           | HRV | 2014 |
| KP984805 | <i>Sus scrofa</i>              | CHN | 2012 |
| KR106195 | <i>Arctocephalus australis</i> | BRA | 2012 |
| KR827412 | <i>Homo sapiens</i>            | CHN | 2012 |
| KR827413 | <i>Homo sapiens</i>            | CHN | 2012 |
| KR827414 | <i>Homo sapiens</i>            | CHN | 2012 |
| KR827415 | <i>Homo sapiens</i>            | CHN | 2013 |
| KR827416 | <i>Homo sapiens</i>            | CHN | 2013 |
| KR827417 | <i>Homo sapiens</i>            | CHN | 2014 |
| KR827418 | <i>Homo sapiens</i>            | CHN | 2013 |
| KR902502 | <i>Equus caballus</i>          | TCD | 2012 |
| KR902503 | <i>Equus caballus</i>          | TCD | 2012 |
| KR902505 | <i>Equus caballus</i>          | TCD | 2012 |
| KR902507 | <i>Equus caballus</i>          | TCD | 2012 |
| KT934307 | <i>Canis lupus</i>             | PRT | 2015 |
| KT934308 | <i>Canis lupus</i>             | PRT | 2015 |
| KT984499 | <i>Macaca mulatta</i>          | TCD | 2014 |
| KU729755 | <i>Zalophus californianus</i>  | AGO | 2008 |
| KU729756 | <i>Zalophus californianus</i>  | AGO | 2008 |
| KU729757 | <i>Zalophus californianus</i>  | AGO | 2008 |
| KU729758 | <i>Zalophus californianus</i>  | AGO | 2008 |
| KU729759 | <i>Zalophus californianus</i>  | AGO | 2008 |
| KU729760 | <i>Zalophus californianus</i>  | AGO | 2008 |
| KU729761 | <i>Zalophus californianus</i>  | AGO | 2009 |
| KU729762 | <i>Zalophus californianus</i>  | AGO | 2009 |
| KU729763 | <i>Zalophus californianus</i>  | AGO | 2009 |
| KU729764 | <i>Zalophus californianus</i>  | AGO | 2009 |
| KU729765 | <i>Zalophus californianus</i>  | AGO | 2009 |

|          |                               |     |      |
|----------|-------------------------------|-----|------|
| KU729766 | <i>Zalophus californianus</i> | AGO | 2009 |
| KU729767 | <i>Zalophus californianus</i> | AGO | 2009 |
| KU729768 | <i>Zalophus californianus</i> | AGO | 2010 |
| KU729769 | <i>Zalophus californianus</i> | AGO | 2010 |
| KU892528 | <i>Homo sapiens</i>           | BEL | 2010 |
| KU892529 | <i>Homo sapiens</i>           | BEL | 2010 |
| KU892530 | <i>Homo sapiens</i>           | BEL | 2010 |
| KX374476 | <i>Bos taurus</i>             | IND | 2015 |
| KX374477 | <i>Sus scrofa</i>             | IND | 2013 |
| KX374478 | <i>Sus scrofa</i>             | IND | 2013 |
| KY053140 | <i>Chlorocebus sabaeus</i>    | KNA | 2015 |
| KY053141 | <i>Chlorocebus sabaeus</i>    | KNA | 2015 |
| KY053142 | <i>Chlorocebus sabaeus</i>    | KNA | 2015 |
| KY053143 | <i>Chlorocebus sabaeus</i>    | KNA | 2015 |
| KY120170 | <i>Felis catus</i>            | AGO | 2012 |
| KY120171 | <i>Felis catus</i>            | AGO | 2012 |
| KY120172 | <i>Felis catus</i>            | AGO | 2012 |
| KY120173 | <i>Felis catus</i>            | AGO | 2012 |
| KY120174 | <i>Felis catus</i>            | AGO | 2012 |
| KY120175 | <i>Felis catus</i>            | AGO | 2012 |
| KY120176 | <i>Felis catus</i>            | AGO | 2012 |
| KY120177 | <i>Felis catus</i>            | AGO | 2012 |
| KY120178 | <i>Felis catus</i>            | AGO | 2012 |
| KY120179 | <i>Felis catus</i>            | AGO | 2012 |
| KY120180 | <i>Felis catus</i>            | AGO | 2012 |
| KY120181 | <i>Felis catus</i>            | AGO | 2012 |
| KY120182 | <i>Simiiformes</i>            | AGO | 2009 |
| KY120183 | <i>Simiiformes</i>            | AGO | 2009 |
| KY120184 | <i>Simiiformes</i>            | AGO | 2009 |
| KY120185 | <i>Simiiformes</i>            | AGO | 2009 |
| KY120186 | <i>Simiiformes</i>            | AGO | 2009 |
| KY120187 | <i>Simiiformes</i>            | AGO | 2009 |
| KY120188 | <i>Simiiformes</i>            | AGO | 2009 |
| KY120189 | <i>Simiiformes</i>            | AGO | 2009 |
| KY120190 | <i>Simiiformes</i>            | AGO | 2009 |
| KY120191 | <i>Simiiformes</i>            | AGO | 2009 |
| KY120192 | <i>Simiiformes</i>            | AGO | 2009 |
| KY120193 | <i>Simiiformes</i>            | AGO | 2009 |
| KY120194 | <i>Simiiformes</i>            | AGO | 2009 |



|          |                        |     |      |
|----------|------------------------|-----|------|
| KY174983 | <i>Macaca mulatta</i>  | TCD | 2012 |
| KY214430 | <i>Sus scrofa</i>      | BEL | 2015 |
| KY214431 | <i>Sus scrofa</i>      | BEL | 2015 |
| KY214432 | <i>Sus scrofa</i>      | BEL | 2015 |
| KY399057 | <i>Canis lupus</i>     | KNA | 2015 |
| KY502850 | <i>Gorilla gorilla</i> | COD | 2015 |
| KY502851 | <i>Gorilla gorilla</i> | COD | 2015 |
| KY502852 | <i>Gorilla gorilla</i> | COD | 2015 |
| KY502853 | <i>Gorilla gorilla</i> | COD | 2015 |
| KY502854 | <i>Gorilla gorilla</i> | COD | 2015 |
| KY502855 | <i>Gorilla gorilla</i> | COD | 2015 |
| KY502856 | <i>Gorilla gorilla</i> | COD | 2015 |
| KY502862 | <i>Gorilla gorilla</i> | COD | 2015 |
| KY502863 | <i>Gorilla gorilla</i> | COD | 2015 |
| KY502864 | <i>Gorilla gorilla</i> | COD | 2015 |
| KY502865 | <i>Gorilla gorilla</i> | COD | 2015 |
| KY502866 | <i>Gorilla gorilla</i> | COD | 2015 |
| KY502867 | <i>Gorilla gorilla</i> | COD | 2015 |
| KY502868 | <i>Gorilla gorilla</i> | COD | 2015 |
| KY502869 | <i>Gorilla gorilla</i> | COD | 2015 |
| KY502870 | <i>Gorilla gorilla</i> | COD | 2015 |
| KY502871 | <i>Gorilla gorilla</i> | COD | 2015 |
| KY502872 | <i>Gorilla gorilla</i> | COD | 2015 |
| KY502873 | <i>Gorilla gorilla</i> | COD | 2015 |
| KY502874 | <i>Gorilla gorilla</i> | COD | 2015 |
| KY502875 | <i>Gorilla gorilla</i> | COD | 2015 |
| KY502876 | <i>Gorilla gorilla</i> | COD | 2015 |
| KY502879 | <i>Gorilla gorilla</i> | COD | 2015 |
| KY502961 | <i>Gorilla gorilla</i> | COD | 2015 |
| KY502962 | <i>Gorilla gorilla</i> | COD | 2015 |
| KY502963 | <i>Gorilla gorilla</i> | COD | 2015 |
| KY502964 | <i>Gorilla gorilla</i> | COD | 2015 |
| KY502965 | <i>Gorilla gorilla</i> | COD | 2015 |
| KY502966 | <i>Gorilla gorilla</i> | COD | 2015 |
| KY502967 | <i>Gorilla gorilla</i> | COD | 2015 |
| KY502968 | <i>Gorilla gorilla</i> | COD | 2015 |
| KY502969 | <i>Gorilla gorilla</i> | COD | 2015 |
| KY502970 | <i>Gorilla gorilla</i> | COD | 2015 |
| KY502978 | <i>Gorilla gorilla</i> | COD | 2015 |

|          |                           |     |      |
|----------|---------------------------|-----|------|
| KY502979 | <i>Gorilla gorilla</i>    | COD | 2015 |
| KY502980 | <i>Gorilla gorilla</i>    | COD | 2015 |
| KY502982 | <i>Gorilla gorilla</i>    | COD | 2015 |
| KY502985 | <i>Gorilla gorilla</i>    | COD | 2015 |
| KY502986 | <i>Gorilla gorilla</i>    | COD | 2015 |
| KY502987 | <i>Gorilla gorilla</i>    | COD | 2015 |
| KY502988 | <i>Gorilla gorilla</i>    | COD | 2015 |
| KY502989 | <i>Gorilla gorilla</i>    | COD | 2015 |
| KY502990 | <i>Gorilla gorilla</i>    | COD | 2015 |
| KY502991 | <i>Gorilla gorilla</i>    | COD | 2015 |
| KY502992 | <i>Gorilla gorilla</i>    | COD | 2015 |
| KY502993 | <i>Gorilla gorilla</i>    | COD | 2015 |
| KY502994 | <i>Gorilla gorilla</i>    | COD | 2015 |
| KY502996 | <i>Gorilla gorilla</i>    | COD | 2015 |
| KY502998 | <i>Gorilla gorilla</i>    | COD | 2015 |
| KY502999 | <i>Gorilla gorilla</i>    | COD | 2015 |
| KY503001 | <i>Gorilla gorilla</i>    | COD | 2015 |
| KY503004 | <i>Gorilla gorilla</i>    | COD | 2015 |
| KY503005 | <i>Gorilla gorilla</i>    | COD | 2015 |
| KY503009 | <i>Gorilla gorilla</i>    | COD | 2015 |
| KY503010 | <i>Gorilla gorilla</i>    | COD | 2015 |
| KY503020 | <i>Gorilla gorilla</i>    | COD | 2015 |
| KY855428 | <i>Marmota himalayana</i> | CHN | 2013 |
| KY855429 | <i>Marmota himalayana</i> | CHN | 2013 |
| KY855430 | <i>Marmota himalayana</i> | CHN | 2013 |
| KY855431 | <i>Marmota himalayana</i> | CHN | 2013 |
| KY928683 | <i>Marmota himalayana</i> | CHN | 2013 |
| KY928684 | <i>Marmota himalayana</i> | CHN | 2013 |
| KY928685 | <i>Marmota himalayana</i> | CHN | 2013 |
| KY928686 | <i>Marmota himalayana</i> | CHN | 2013 |
| KY928687 | <i>Marmota himalayana</i> | CHN | 2013 |
| KY928688 | <i>Marmota himalayana</i> | CHN | 2013 |
| KY928689 | <i>Marmota himalayana</i> | CHN | 2013 |
| KY928690 | <i>Marmota himalayana</i> | CHN | 2013 |
| KY928691 | <i>Marmota himalayana</i> | CHN | 2013 |
| KY928692 | <i>Marmota himalayana</i> | CHN | 2013 |
| KY928693 | <i>Marmota himalayana</i> | CHN | 2013 |
| KY928694 | <i>Marmota himalayana</i> | CHN | 2013 |
| KY928695 | <i>Marmota himalayana</i> | CHN | 2013 |

|          |                           |     |      |
|----------|---------------------------|-----|------|
| KY928696 | <i>Marmota himalayana</i> | CHN | 2013 |
| KY928697 | <i>Marmota himalayana</i> | CHN | 2013 |
| KY928698 | <i>Marmota himalayana</i> | CHN | 2013 |
| KY928699 | <i>Marmota himalayana</i> | CHN | 2013 |
| KY928700 | <i>Marmota himalayana</i> | CHN | 2013 |
| KY928701 | <i>Marmota himalayana</i> | CHN | 2013 |
| KY928702 | <i>Marmota himalayana</i> | CHN | 2013 |
| KY928703 | <i>Marmota himalayana</i> | CHN | 2013 |
| KY928704 | <i>Marmota himalayana</i> | CHN | 2013 |
| KY928705 | <i>Marmota himalayana</i> | CHN | 2013 |
| KY928706 | <i>Marmota himalayana</i> | CHN | 2013 |
| KY928707 | <i>Marmota himalayana</i> | CHN | 2013 |
| KY928708 | <i>Marmota himalayana</i> | CHN | 2013 |
| KY928709 | <i>Marmota himalayana</i> | CHN | 2013 |
| KY928710 | <i>Marmota himalayana</i> | CHN | 2013 |
| KY928711 | <i>Marmota himalayana</i> | CHN | 2013 |
| KY928712 | <i>Marmota himalayana</i> | CHN | 2013 |
| KY928713 | <i>Marmota himalayana</i> | CHN | 2013 |
| KY928714 | <i>Marmota himalayana</i> | CHN | 2013 |
| KY928715 | <i>Marmota himalayana</i> | CHN | 2013 |
| KY928716 | <i>Marmota himalayana</i> | CHN | 2013 |
| KY928717 | <i>Marmota himalayana</i> | CHN | 2013 |
| KY928718 | <i>Marmota himalayana</i> | CHN | 2013 |
| KY928719 | <i>Marmota himalayana</i> | CHN | 2013 |
| KY928720 | <i>Marmota himalayana</i> | CHN | 2013 |
| KY928721 | <i>Marmota himalayana</i> | CHN | 2013 |
| KY928722 | <i>Marmota himalayana</i> | CHN | 2013 |
| KY928723 | <i>Marmota himalayana</i> | CHN | 2013 |
| KY928724 | <i>Marmota himalayana</i> | CHN | 2013 |
| KY928725 | <i>Marmota himalayana</i> | CHN | 2013 |
| KY928726 | <i>Marmota himalayana</i> | CHN | 2013 |
| KY928727 | <i>Marmota himalayana</i> | CHN | 2013 |
| KY928728 | <i>Marmota himalayana</i> | CHN | 2013 |
| KY928729 | <i>Marmota himalayana</i> | CHN | 2013 |
| KY928730 | <i>Marmota himalayana</i> | CHN | 2013 |
| KY928731 | <i>Marmota himalayana</i> | CHN | 2013 |
| KY928732 | <i>Marmota himalayana</i> | CHN | 2013 |
| KY928733 | <i>Marmota himalayana</i> | CHN | 2013 |
| KY928734 | <i>Marmota himalayana</i> | CHN | 2013 |

|          |                            |     |      |
|----------|----------------------------|-----|------|
| KY928735 | <i>Marmota himalayana</i>  | CHN | 2013 |
| KY928736 | <i>Marmota himalayana</i>  | CHN | 2013 |
| KY928737 | <i>Marmota himalayana</i>  | CHN | 2013 |
| KY928738 | <i>Marmota himalayana</i>  | CHN | 2013 |
| LC110353 | <i>Mus musculus</i>        | JPN | 2015 |
| LC338002 | <i>Camelus dromedarius</i> | ARE | 2013 |
| LC338003 | <i>Camelus dromedarius</i> | ARE | 2013 |
| LC338004 | <i>Camelus dromedarius</i> | ARE | 2013 |
| LC338005 | <i>Camelus dromedarius</i> | ARE | 2013 |
| LC338006 | <i>Camelus dromedarius</i> | ARE | 2013 |
| LC338007 | <i>Camelus dromedarius</i> | ARE | 2013 |
| LC338008 | <i>Camelus dromedarius</i> | ARE | 2013 |
| LC338009 | <i>Camelus dromedarius</i> | ARE | 2013 |
| MF071281 | <i>Felis catus</i>         | KNA | 2014 |
| MF416389 | <i>Mus musculus</i>        | TCD | 2015 |
| MF416390 | <i>Mus musculus</i>        | TCD | 2014 |
| MF416391 | <i>Mus musculus</i>        | TCD | 2014 |
| MG003334 | <i>Camelus dromedarius</i> | IND | 2016 |
| MG003339 | <i>Bos taurus</i>          | IND | 2015 |
| MG003340 | <i>Bos taurus</i>          | IND | 2015 |
| MG003341 | <i>Bos taurus</i>          | IND | 2015 |
| MG010904 | <i>Macaca mulatta</i>      | TCD | 2011 |
| MG010905 | <i>Macaca mulatta</i>      | TCD | 2011 |
| MG010906 | <i>Macaca mulatta</i>      | TCD | 2011 |
| MG010907 | <i>Macaca mulatta</i>      | TCD | 2011 |
| MG010908 | <i>Macaca mulatta</i>      | TCD | 2011 |
| MG010909 | <i>Macaca mulatta</i>      | TCD | 2011 |
| MG010910 | <i>Macaca mulatta</i>      | TCD | 2011 |
| MG010911 | <i>Macaca mulatta</i>      | TCD | 2011 |
| MG010912 | <i>Macaca mulatta</i>      | TCD | 2011 |
| MG010913 | <i>Macaca mulatta</i>      | TCD | 2011 |
| MG010915 | <i>Macaca mulatta</i>      | TCD | 2011 |
| MG010916 | <i>Macaca mulatta</i>      | TCD | 2011 |
| MG010917 | <i>Macaca mulatta</i>      | TCD | 2011 |
| MG010918 | <i>Macaca mulatta</i>      | TCD | 2011 |
| MG010919 | <i>Macaca mulatta</i>      | TCD | 2011 |
| MG010920 | <i>Macaca mulatta</i>      | TCD | 2011 |
| MG010921 | <i>Macaca mulatta</i>      | TCD | 2011 |
| MG190029 | <i>Roe deer</i>            | SVN | 2014 |

|          |                               |     |      |
|----------|-------------------------------|-----|------|
| MG571903 | <i>Homo sapiens</i>           | SEN | 2015 |
| MG571907 | <i>Homo sapiens</i>           | SEN | 2015 |
| MG600063 | <i>Parupeneus cyclostomus</i> | CHN | NA   |
| MG600064 | <i>Tropidophorus sinicus</i>  | CHN | NA   |
| MG821233 | <i>Caprine</i>                | IND | 2015 |
| MG846401 | <i>Gallus gallus</i>          | BRA | 2015 |
| MG846402 | <i>Gallus gallus</i>          | BRA | 2015 |
| MG846403 | <i>Gallus gallus</i>          | BRA | 2015 |
| MG846404 | <i>Gallus gallus</i>          | BRA | 2015 |
| MG846405 | <i>Gallus gallus</i>          | BRA | 2015 |
| MG846406 | <i>Gallus gallus</i>          | BRA | 2015 |
| MG846407 | <i>Gallus gallus</i>          | BRA | 2015 |
| MG846408 | <i>Gallus gallus</i>          | BRA | 2015 |
| MG846409 | <i>Gallus gallus</i>          | BRA | 2015 |
| MG846410 | <i>Gallus gallus</i>          | BRA | 2015 |
| MG846411 | <i>Gallus gallus</i>          | BRA | 2015 |
| MG846412 | <i>Gallus gallus</i>          | BRA | 2015 |
| MH327934 | <i>Gallus gallus</i>          | HUN | 2011 |
| MH412924 | <i>Rattus sp.</i>             | KNA | 2017 |
| MH453875 | <i>Australian Shelduck</i>    | AUS | 2012 |
| MH453878 | <i>Australian Shelduck</i>    | AUS | 2012 |
| MH933801 | <i>Homo sapiens</i>           | CMR | 2014 |
| MH933802 | <i>Homo sapiens</i>           | CMR | 2014 |
| MH933803 | <i>Homo sapiens</i>           | CMR | 2014 |
| MH933804 | <i>Homo sapiens</i>           | CMR | 2014 |
| MH933805 | <i>Homo sapiens</i>           | CMR | 2014 |
| MH933806 | <i>Homo sapiens</i>           | CMR | 2014 |
| MH933807 | <i>Homo sapiens</i>           | CMR | 2014 |
| MH933808 | <i>Homo sapiens</i>           | CMR | 2014 |
| MH933809 | <i>Homo sapiens</i>           | CMR | 2014 |
| MH933810 | <i>Homo sapiens</i>           | CMR | 2014 |
| MH933811 | <i>Homo sapiens</i>           | CMR | 2014 |
| MH933812 | <i>Homo sapiens</i>           | CMR | 2014 |
| MH933813 | <i>Homo sapiens</i>           | CMR | 2014 |
| MH933814 | <i>Homo sapiens</i>           | CMR | 2014 |
| MH933815 | <i>Homo sapiens</i>           | CMR | 2014 |
| MH933817 | <i>Homo sapiens</i>           | CMR | 2014 |
| MH933818 | <i>Homo sapiens</i>           | CMR | 2014 |
| MH933819 | <i>Homo sapiens</i>           | CMR | 2014 |

|          |                                    |     |      |
|----------|------------------------------------|-----|------|
| MH933820 | <i>Homo sapiens</i>                | CMR | 2014 |
| MH933821 | <i>Homo sapiens</i>                | CMR | 2014 |
| MH933822 | <i>Homo sapiens</i>                | CMR | 2014 |
| MH933823 | <i>Homo sapiens</i>                | CMR | 2014 |
| MH933824 | <i>Homo sapiens</i>                | CMR | 2014 |
| MH933825 | <i>Homo sapiens</i>                | CMR | 2014 |
| MH933830 | <i>Homo sapiens</i>                | CMR | 2014 |
| MH933831 | <i>Homo sapiens</i>                | CMR | 2014 |
| MH933832 | <i>Homo sapiens</i>                | CMR | 2014 |
| MH933833 | <i>Homo sapiens</i>                | CMR | 2014 |
| MH933834 | <i>Homo sapiens</i>                | CMR | 2014 |
| MH933835 | <i>Homo sapiens</i>                | CMR | 2014 |
| MH933836 | <i>Homo sapiens</i>                | CMR | 2014 |
| MH933839 | <i>Homo sapiens</i>                | CMR | 2014 |
| MH933841 | <i>Homo sapiens</i>                | CMR | 2014 |
| MK064212 | <i>Chiroptera</i>                  | CHN | 2016 |
| MK064213 | <i>Chiroptera</i>                  | CHN | 2016 |
| MK204395 | <i>Anas gracilis</i>               | AUS | 2017 |
| MK204418 | <i>Malacorhynchus membranaceus</i> | AUS | 2017 |
| MK305310 | <i>Homo sapiens</i>                | AGO | 2018 |
| MK378834 | <i>Sus scrofa</i>                  | CHN | 2017 |
| MK378835 | <i>Sus scrofa</i>                  | CHN | 2017 |
| MK378843 | <i>Sus scrofa</i>                  | CHN | 2017 |
| MK378844 | <i>Sus scrofa</i>                  | CHN | 2017 |
| MK378845 | <i>Sus scrofa</i>                  | CHN | 2017 |
| MK378851 | <i>Sus scrofa</i>                  | CHN | 2017 |
| MK378856 | <i>Sus scrofa</i>                  | CHN | 2017 |
| MK378859 | <i>Sus scrofa</i>                  | CHN | 2017 |
| MK378860 | <i>Sus scrofa</i>                  | CHN | 2017 |
| MK378865 | <i>Sus scrofa</i>                  | CHN | 2017 |
| MK378866 | <i>Sus scrofa</i>                  | CHN | 2017 |
| MK378867 | <i>Sus scrofa</i>                  | CHN | 2017 |
| MK378868 | <i>Sus scrofa</i>                  | CHN | 2017 |
| MK378869 | <i>Sus scrofa</i>                  | CHN | 2017 |
| MK378870 | <i>Sus scrofa</i>                  | CHN | 2017 |
| MK378876 | <i>Sus scrofa</i>                  | CHN | 2017 |
| MK521919 | <i>Sarcophilus harrisii</i>        | AUS | 2017 |
| MK521920 | <i>Sarcophilus harrisii</i>        | AUS | 2016 |
| MK521921 | <i>Sarcophilus harrisii</i>        | AUS | 2017 |

|          |                              |     |      |
|----------|------------------------------|-----|------|
| MK521922 | <i>Sarcophilus harrisii</i>  | AUS | 2017 |
| MK521923 | <i>Sarcophilus harrisii</i>  | AUS | 2017 |
| MK521924 | <i>Sarcophilus harrisii</i>  | AUS | 2016 |
| MK521925 | <i>Sarcophilus harrisii</i>  | AUS | 2016 |
| MK521926 | <i>Sarcophilus harrisii</i>  | AUS | 2017 |
| MN145873 | <i>Homo sapiens</i>          | CHN | 2018 |
| MN563295 | <i>Urva auropunctata</i>     | KNA | 2017 |
| MN563296 | <i>Urva auropunctata</i>     | KNA | 2017 |
| MN563297 | <i>Urva auropunctata</i>     | KNA | 2017 |
| MN563298 | <i>Urva auropunctata</i>     | KNA | 2017 |
| MN563299 | <i>Urva auropunctata</i>     | KNA | 2017 |
| MN563300 | <i>Urva auropunctata</i>     | KNA | 2017 |
| MN563301 | <i>Urva auropunctata</i>     | KNA | 2017 |
| MN563302 | <i>Urva auropunctata</i>     | KNA | 2017 |
| MN692671 | <i>Macaca fascicularis</i>   | THA | 2017 |
| MN871976 | <i>Chlorocebus sabaeus</i>   | CHN | 2018 |
| MT129742 | NA                           | AUS | 2017 |
| MT129743 | NA                           | AUS | 2017 |
| MT129744 | NA                           | AUS | 2017 |
| MT129745 | NA                           | AUS | 2017 |
| MT129746 | NA                           | AUS | 2017 |
| MT129747 | NA                           | AUS | 2017 |
| MT129748 | NA                           | AUS | 2017 |
| MT129749 | NA                           | AUS | 2017 |
| MT129750 | NA                           | AUS | 2017 |
| MT129751 | NA                           | AUS | 2017 |
| MT129752 | NA                           | AUS | 2017 |
| MT129753 | NA                           | AUS | 2017 |
| MT150089 | NA                           | NA  | 2018 |
| MT341487 | <i>Actinonaias pectorosa</i> | TCD | 2018 |
| MT350351 | <i>Pan troglodytes</i>       | SLE | NA   |
| MT350352 | <i>Pan troglodytes</i>       | SLE | NA   |
| MT846991 | <i>Pantholops hodgsonii</i>  | CHN | 2014 |
| MT847000 | <i>Pantholops hodgsonii</i>  | CHN | 2014 |
| MT847001 | <i>Pantholops hodgsonii</i>  | CHN | 2014 |
| MT847002 | <i>Pantholops hodgsonii</i>  | CHN | 2014 |
| MT847003 | <i>Pantholops hodgsonii</i>  | CHN | 2014 |
| MT847004 | <i>Pantholops hodgsonii</i>  | CHN | 2014 |
| MT847005 | <i>Pantholops hodgsonii</i>  | CHN | 2014 |

|           |                               |     |      |
|-----------|-------------------------------|-----|------|
| MT847006  | <i>Pantholops hodgsonii</i>   | CHN | 2014 |
| MT847007  | <i>Pantholops hodgsonii</i>   | CHN | 2014 |
| MT847008  | <i>Pantholops hodgsonii</i>   | CHN | 2014 |
| MT847009  | <i>Pantholops hodgsonii</i>   | CHN | 2014 |
| MT847010  | <i>Pantholops hodgsonii</i>   | CHN | 2014 |
| MT847011  | <i>Pantholops hodgsonii</i>   | CHN | 2014 |
| MT847012  | <i>Pantholops hodgsonii</i>   | CHN | 2014 |
| NC_007027 | NA                            | THA | NA   |
| NC_29802  | <i>Sus scrofa</i>             | ITA | 2004 |
| NC_34161  | <i>Zalophus californianus</i> | AGO | 2008 |
| NC_34452  | <i>Chlorocebus sabaeus</i>    | KNA | 2015 |
| NC_35206  | <i>Canis lupus</i>            | KNA | 2015 |
| NC_40439  | <i>Gallus gallus</i>          | HUN | 2011 |
| NC_40753  | <i>Roe deer</i>               | SVN | 2014 |

**Supplemental Table S1.** RdRp sequences of PBV used in the current study for phylogenetic analysis.

| GenBank ID | Host                          | Country code | Years |
|------------|-------------------------------|--------------|-------|
| JQ776551   | <i>Zalophus californianus</i> | AGO          | 2005  |
| KF861768   | <i>Sus scrofa</i>             | ITA          | 2004  |
| KF861770   | <i>Sus scrofa</i>             | ITA          | 2004  |
| KF861771   | <i>Sus scrofa</i>             | ITA          | 2004  |
| KF861772   | <i>Sus scrofa</i>             | ITA          | 2004  |
| KJ206568   | <i>Homo sapiens</i>           | NLD          | NA    |
| KJ495689   | <i>Meleagris gallopavo</i>    | TCD          | 2011  |
| KJ663815   | <i>Homo sapiens</i>           | TCD          | 2013  |
| KM573778   | <i>Camelus dromedarius</i>    | ARE          | 2013  |
| KM573779   | <i>Camelus dromedarius</i>    | ARE          | 2013  |
| KM573780   | <i>Camelus dromedarius</i>    | ARE          | 2013  |
| KM573781   | <i>Camelus dromedarius</i>    | ARE          | 2013  |
| KM573782   | <i>Camelus dromedarius</i>    | ARE          | 2013  |
| KM573783   | <i>Camelus dromedarius</i>    | ARE          | 2013  |
| KM573784   | <i>Camelus dromedarius</i>    | ARE          | 2013  |
| KM573785   | <i>Camelus dromedarius</i>    | ARE          | 2013  |
| KM573786   | <i>Camelus dromedarius</i>    | ARE          | 2013  |



|          |                               |     |      |
|----------|-------------------------------|-----|------|
| KM573787 | <i>Camelus dromedarius</i>    | ARE | 2013 |
| KM573788 | <i>Camelus dromedarius</i>    | ARE | 2013 |
| KM573789 | <i>Camelus dromedarius</i>    | ARE | 2013 |
| KM573790 | <i>Camelus dromedarius</i>    | ARE | 2013 |
| KM573791 | <i>Camelus dromedarius</i>    | ARE | 2013 |
| KM573792 | <i>Camelus dromedarius</i>    | ARE | 2013 |
| KM573794 | <i>Camelus dromedarius</i>    | ARE | 2013 |
| KM573795 | <i>Camelus dromedarius</i>    | ARE | 2013 |
| KM573796 | <i>Camelus dromedarius</i>    | ARE | 2013 |
| KM573797 | <i>Camelus dromedarius</i>    | ARE | 2013 |
| KR902502 | <i>Equus caballus</i>         | TCD | 2012 |
| KR902504 | <i>Equus caballus</i>         | TCD | 2012 |
| KR902506 | <i>Equus caballus</i>         | TCD | 2012 |
| KR902508 | <i>Equus caballus</i>         | TCD | 2012 |
| KT934309 | <i>Canis lupus</i>            | PRT | 2015 |
| KT934310 | <i>Canis lupus</i>            | PRT | 2015 |
| KU729746 | <i>Zalophus californianus</i> | AGO | 2008 |
| KU729747 | <i>Zalophus californianus</i> | AGO | 2009 |
| KU729748 | <i>Zalophus californianus</i> | AGO | 2009 |
| KU729749 | <i>Zalophus californianus</i> | AGO | 2008 |
| KU729750 | <i>Zalophus californianus</i> | AGO | 2009 |
| KU729751 | <i>Zalophus californianus</i> | AGO | 2009 |
| KU729752 | <i>Zalophus californianus</i> | AGO | 2009 |
| KU729753 | <i>Zalophus californianus</i> | AGO | 2009 |
| KU729754 | <i>Zalophus californianus</i> | AGO | 2008 |
| KU892524 | <i>Homo sapiens</i>           | BEL | 2010 |
| KU892525 | <i>Homo sapiens</i>           | BEL | 2010 |
| KU892526 | <i>Homo sapiens</i>           | BEL | 2010 |
| KU892527 | <i>Homo sapiens</i>           | BEL | 2010 |
| KY174982 | <i>Macaca mulatta</i>         | TCD | 2012 |
| KY214426 | <i>Sus scrofa</i>             | BEL | 2015 |
| KY214427 | <i>Sus scrofa</i>             | BEL | 2015 |
| KY214428 | <i>Sus scrofa</i>             | BEL | 2015 |
| KY214429 | <i>Sus scrofa</i>             | BEL | 2015 |
| KY502835 | <i>Gorilla gorilla</i>        | COD | 2015 |
| KY502836 | <i>Gorilla gorilla</i>        | COD | 2015 |
| KY502837 | <i>Gorilla gorilla</i>        | COD | 2015 |
| KY502838 | <i>Gorilla gorilla</i>        | COD | 2015 |
| KY502839 | <i>Gorilla gorilla</i>        | COD | 2015 |

|          |                           |     |      |
|----------|---------------------------|-----|------|
| KY502840 | <i>Gorilla gorilla</i>    | COD | 2015 |
| KY502841 | <i>Gorilla gorilla</i>    | COD | 2015 |
| KY502842 | <i>Gorilla gorilla</i>    | COD | 2015 |
| KY502843 | <i>Gorilla gorilla</i>    | COD | 2015 |
| KY502845 | <i>Gorilla gorilla</i>    | COD | 2015 |
| KY502846 | <i>Gorilla gorilla</i>    | COD | 2015 |
| KY502847 | <i>Gorilla gorilla</i>    | COD | 2015 |
| KY502848 | <i>Gorilla gorilla</i>    | COD | 2015 |
| KY502849 | <i>Gorilla gorilla</i>    | COD | 2015 |
| KY502857 | <i>Gorilla gorilla</i>    | COD | 2015 |
| KY502858 | <i>Gorilla gorilla</i>    | COD | 2015 |
| KY502859 | <i>Gorilla gorilla</i>    | COD | 2015 |
| KY502860 | <i>Gorilla gorilla</i>    | COD | 2015 |
| KY502878 | <i>Gorilla gorilla</i>    | COD | 2015 |
| KY502932 | <i>Gorilla gorilla</i>    | COD | 2015 |
| KY502935 | <i>Gorilla gorilla</i>    | COD | 2015 |
| KY502937 | <i>Gorilla gorilla</i>    | COD | 2015 |
| KY502943 | <i>Gorilla gorilla</i>    | COD | 2015 |
| KY502944 | <i>Gorilla gorilla</i>    | COD | 2015 |
| KY502946 | <i>Gorilla gorilla</i>    | COD | 2015 |
| KY502947 | <i>Gorilla gorilla</i>    | COD | 2015 |
| KY502948 | <i>Gorilla gorilla</i>    | COD | 2015 |
| KY502951 | <i>Gorilla gorilla</i>    | COD | 2015 |
| KY502952 | <i>Gorilla gorilla</i>    | COD | 2015 |
| KY502953 | <i>Gorilla gorilla</i>    | COD | 2015 |
| KY502972 | <i>Gorilla gorilla</i>    | COD | 2015 |
| KY502973 | <i>Gorilla gorilla</i>    | COD | 2015 |
| KY502975 | <i>Gorilla gorilla</i>    | COD | 2015 |
| KY502977 | <i>Gorilla gorilla</i>    | COD | 2015 |
| KY503014 | <i>Gorilla gorilla</i>    | COD | 2015 |
| KY855428 | <i>Marmota himalayana</i> | CHN | 2013 |
| KY855429 | <i>Marmota himalayana</i> | CHN | 2013 |
| KY855430 | <i>Marmota himalayana</i> | CHN | 2013 |
| KY855431 | <i>Marmota himalayana</i> | CHN | 2013 |
| KY928739 | <i>Marmota himalayana</i> | CHN | 2013 |
| KY928740 | <i>Marmota himalayana</i> | CHN | 2013 |
| KY928741 | <i>Marmota himalayana</i> | CHN | 2013 |
| KY928742 | <i>Marmota himalayana</i> | CHN | 2013 |
| KY928743 | <i>Marmota himalayana</i> | CHN | 2013 |

|          |                           |     |      |
|----------|---------------------------|-----|------|
| KY928744 | <i>Marmota himalayana</i> | CHN | 2013 |
| KY928745 | <i>Marmota himalayana</i> | CHN | 2013 |
| KY928746 | <i>Marmota himalayana</i> | CHN | 2013 |
| KY928747 | <i>Marmota himalayana</i> | CHN | 2013 |
| KY928748 | <i>Marmota himalayana</i> | CHN | 2013 |
| KY928749 | <i>Marmota himalayana</i> | CHN | 2013 |
| KY928750 | <i>Marmota himalayana</i> | CHN | 2013 |
| KY928751 | <i>Marmota himalayana</i> | CHN | 2013 |
| KY928752 | <i>Marmota himalayana</i> | CHN | 2013 |
| KY928753 | <i>Marmota himalayana</i> | CHN | 2013 |
| KY928754 | <i>Marmota himalayana</i> | CHN | 2013 |
| KY928755 | <i>Marmota himalayana</i> | CHN | 2013 |
| KY928756 | <i>Marmota himalayana</i> | CHN | 2013 |
| KY928757 | <i>Marmota himalayana</i> | CHN | 2013 |
| KY928758 | <i>Marmota himalayana</i> | CHN | 2013 |
| KY928759 | <i>Marmota himalayana</i> | CHN | 2013 |
| KY928760 | <i>Marmota himalayana</i> | CHN | 2013 |
| KY928761 | <i>Marmota himalayana</i> | CHN | 2013 |
| KY928762 | <i>Marmota himalayana</i> | CHN | 2013 |
| KY928763 | <i>Marmota himalayana</i> | CHN | 2013 |
| KY928764 | <i>Marmota himalayana</i> | CHN | 2013 |
| KY928765 | <i>Marmota himalayana</i> | CHN | 2013 |
| KY928766 | <i>Marmota himalayana</i> | CHN | 2013 |
| KY928767 | <i>Marmota himalayana</i> | CHN | 2013 |
| KY928768 | <i>Marmota himalayana</i> | CHN | 2013 |
| KY928769 | <i>Marmota himalayana</i> | CHN | 2013 |
| KY928770 | <i>Marmota himalayana</i> | CHN | 2013 |
| KY928771 | <i>Marmota himalayana</i> | CHN | 2013 |
| KY928772 | <i>Marmota himalayana</i> | CHN | 2013 |
| KY928773 | <i>Marmota himalayana</i> | CHN | 2013 |
| KY928774 | <i>Marmota himalayana</i> | CHN | 2013 |
| KY928775 | <i>Marmota himalayana</i> | CHN | 2013 |
| KY928776 | <i>Marmota himalayana</i> | CHN | 2013 |
| KY928777 | <i>Marmota himalayana</i> | CHN | 2013 |
| KY928778 | <i>Marmota himalayana</i> | CHN | 2013 |
| KY928779 | <i>Marmota himalayana</i> | CHN | 2013 |
| KY928780 | <i>Marmota himalayana</i> | CHN | 2013 |
| KY928781 | <i>Marmota himalayana</i> | CHN | 2013 |
| KY928782 | <i>Marmota himalayana</i> | CHN | 2013 |

|          |                           |     |      |
|----------|---------------------------|-----|------|
| KY928783 | <i>Marmota himalayana</i> | CHN | 2013 |
| KY928784 | <i>Marmota himalayana</i> | CHN | 2013 |
| KY928785 | <i>Marmota himalayana</i> | CHN | 2013 |
| KY928786 | <i>Marmota himalayana</i> | CHN | 2013 |
| KY928787 | <i>Marmota himalayana</i> | CHN | 2013 |
| KY928788 | <i>Marmota himalayana</i> | CHN | 2013 |
| KY928789 | <i>Marmota himalayana</i> | CHN | 2013 |
| KY928790 | <i>Marmota himalayana</i> | CHN | 2013 |
| KY928791 | <i>Marmota himalayana</i> | CHN | 2013 |
| KY928792 | <i>Marmota himalayana</i> | CHN | 2013 |
| KY928793 | <i>Marmota himalayana</i> | CHN | 2013 |
| KY928794 | <i>Marmota himalayana</i> | CHN | 2013 |
| KY928795 | <i>Marmota himalayana</i> | CHN | 2013 |
| KY928796 | <i>Marmota himalayana</i> | CHN | 2013 |
| KY928797 | <i>Marmota himalayana</i> | CHN | 2013 |
| KY928798 | <i>Marmota himalayana</i> | CHN | 2013 |
| KY928799 | <i>Marmota himalayana</i> | CHN | 2013 |
| KY928800 | <i>Marmota himalayana</i> | CHN | 2013 |
| KY928801 | <i>Marmota himalayana</i> | CHN | 2013 |
| KY928802 | <i>Marmota himalayana</i> | CHN | 2013 |
| KY928803 | <i>Marmota himalayana</i> | CHN | 2013 |
| KY928804 | <i>Marmota himalayana</i> | CHN | 2013 |
| KY928805 | <i>Marmota himalayana</i> | CHN | 2013 |
| KY928806 | <i>Marmota himalayana</i> | CHN | 2013 |
| KY928807 | <i>Marmota himalayana</i> | CHN | 2013 |
| KY928808 | <i>Marmota himalayana</i> | CHN | 2013 |
| KY928809 | <i>Marmota himalayana</i> | CHN | 2013 |
| KY928810 | <i>Marmota himalayana</i> | CHN | 2013 |
| KY928811 | <i>Marmota himalayana</i> | CHN | 2013 |
| KY928812 | <i>Marmota himalayana</i> | CHN | 2013 |
| KY928813 | <i>Marmota himalayana</i> | CHN | 2013 |
| KY928814 | <i>Marmota himalayana</i> | CHN | 2013 |
| KY928815 | <i>Marmota himalayana</i> | CHN | 2013 |
| KY928816 | <i>Marmota himalayana</i> | CHN | 2013 |
| KY928817 | <i>Marmota himalayana</i> | CHN | 2013 |
| KY928818 | <i>Marmota himalayana</i> | CHN | 2013 |
| KY928819 | <i>Marmota himalayana</i> | CHN | 2013 |
| KY928820 | <i>Marmota himalayana</i> | CHN | 2013 |
| KY928821 | <i>Marmota himalayana</i> | CHN | 2013 |

|          |                           |     |      |
|----------|---------------------------|-----|------|
| KY928822 | <i>Marmota himalayana</i> | CHN | 2013 |
| KY928823 | <i>Marmota himalayana</i> | CHN | 2013 |
| KY928824 | <i>Marmota himalayana</i> | CHN | 2013 |
| KY928825 | <i>Marmota himalayana</i> | CHN | 2013 |
| KY928826 | <i>Marmota himalayana</i> | CHN | 2013 |
| KY928827 | <i>Marmota himalayana</i> | CHN | 2013 |
| KY928828 | <i>Marmota himalayana</i> | CHN | 2013 |
| KY928829 | <i>Marmota himalayana</i> | CHN | 2013 |
| KY928830 | <i>Marmota himalayana</i> | CHN | 2013 |
| KY928831 | <i>Marmota himalayana</i> | CHN | 2013 |
| KY928832 | <i>Marmota himalayana</i> | CHN | 2013 |
| KY928833 | <i>Marmota himalayana</i> | CHN | 2013 |
| KY928834 | <i>Marmota himalayana</i> | CHN | 2013 |
| KY928835 | <i>Marmota himalayana</i> | CHN | 2013 |
| KY928836 | <i>Marmota himalayana</i> | CHN | 2013 |
| KY928837 | <i>Marmota himalayana</i> | CHN | 2013 |
| KY928838 | <i>Marmota himalayana</i> | CHN | 2013 |
| KY928839 | <i>Marmota himalayana</i> | CHN | 2013 |
| KY928840 | <i>Marmota himalayana</i> | CHN | 2013 |
| KY928841 | <i>Marmota himalayana</i> | CHN | 2013 |
| KY928842 | <i>Marmota himalayana</i> | CHN | 2013 |
| KY928843 | <i>Marmota himalayana</i> | CHN | 2013 |
| KY928844 | <i>Marmota himalayana</i> | CHN | 2013 |
| KY928845 | <i>Marmota himalayana</i> | CHN | 2013 |
| KY928846 | <i>Marmota himalayana</i> | CHN | 2013 |
| KY928848 | <i>Marmota himalayana</i> | CHN | 2013 |
| KY928849 | <i>Marmota himalayana</i> | CHN | 2013 |
| KY928850 | <i>Marmota himalayana</i> | CHN | 2013 |
| KY928851 | <i>Marmota himalayana</i> | CHN | 2013 |
| KY928852 | <i>Marmota himalayana</i> | CHN | 2013 |
| KY928853 | <i>Marmota himalayana</i> | CHN | 2013 |
| KY928854 | <i>Marmota himalayana</i> | CHN | 2013 |
| KY928855 | <i>Marmota himalayana</i> | CHN | 2013 |
| KY928856 | <i>Marmota himalayana</i> | CHN | 2013 |
| KY928857 | <i>Marmota himalayana</i> | CHN | 2013 |
| KY928858 | <i>Marmota himalayana</i> | CHN | 2013 |
| KY928859 | <i>Marmota himalayana</i> | CHN | 2013 |
| KY928860 | <i>Marmota himalayana</i> | CHN | 2013 |
| KY928861 | <i>Marmota himalayana</i> | CHN | 2013 |

|          |                           |     |      |
|----------|---------------------------|-----|------|
| KY928862 | <i>Marmota himalayana</i> | CHN | 2013 |
| KY928863 | <i>Marmota himalayana</i> | CHN | 2013 |
| KY928864 | <i>Marmota himalayana</i> | CHN | 2013 |
| KY928865 | <i>Marmota himalayana</i> | CHN | 2013 |
| KY928866 | <i>Marmota himalayana</i> | CHN | 2013 |
| KY928867 | <i>Marmota himalayana</i> | CHN | 2013 |
| KY928868 | <i>Marmota himalayana</i> | CHN | 2013 |
| KY928869 | <i>Marmota himalayana</i> | CHN | 2013 |
| KY928870 | <i>Marmota himalayana</i> | CHN | 2013 |
| KY928871 | <i>Marmota himalayana</i> | CHN | 2013 |
| KY928872 | <i>Marmota himalayana</i> | CHN | 2013 |
| KY928873 | <i>Marmota himalayana</i> | CHN | 2013 |
| KY928874 | <i>Marmota himalayana</i> | CHN | 2013 |
| KY928875 | <i>Marmota himalayana</i> | CHN | 2013 |
| KY928876 | <i>Marmota himalayana</i> | CHN | 2013 |
| KY928877 | <i>Marmota himalayana</i> | CHN | 2013 |
| KY928878 | <i>Marmota himalayana</i> | CHN | 2013 |
| KY928879 | <i>Marmota himalayana</i> | CHN | 2013 |
| KY928880 | <i>Marmota himalayana</i> | CHN | 2013 |
| KY928881 | <i>Marmota himalayana</i> | CHN | 2013 |
| KY928882 | <i>Marmota himalayana</i> | CHN | 2013 |
| KY928883 | <i>Marmota himalayana</i> | CHN | 2013 |
| KY928884 | <i>Marmota himalayana</i> | CHN | 2013 |
| KY928885 | <i>Marmota himalayana</i> | CHN | 2013 |
| KY928886 | <i>Marmota himalayana</i> | CHN | 2013 |
| KY928887 | <i>Marmota himalayana</i> | CHN | 2013 |
| KY928888 | <i>Marmota himalayana</i> | CHN | 2013 |
| KY928889 | <i>Marmota himalayana</i> | CHN | 2013 |
| KY928890 | <i>Marmota himalayana</i> | CHN | 2013 |
| KY928891 | <i>Marmota himalayana</i> | CHN | 2013 |
| KY928892 | <i>Marmota himalayana</i> | CHN | 2013 |
| KY928893 | <i>Marmota himalayana</i> | CHN | 2013 |
| KY928894 | <i>Marmota himalayana</i> | CHN | 2013 |
| KY928895 | <i>Marmota himalayana</i> | CHN | 2013 |
| KY928896 | <i>Marmota himalayana</i> | CHN | 2013 |
| KY928897 | <i>Marmota himalayana</i> | CHN | 2013 |
| KY928898 | <i>Marmota himalayana</i> | CHN | 2013 |
| KY928899 | <i>Marmota himalayana</i> | CHN | 2013 |
| KY928900 | <i>Marmota himalayana</i> | CHN | 2013 |

|          |                           |     |      |
|----------|---------------------------|-----|------|
| KY928901 | <i>Marmota himalayana</i> | CHN | 2013 |
| KY928902 | <i>Marmota himalayana</i> | CHN | 2013 |
| KY928903 | <i>Marmota himalayana</i> | CHN | 2013 |
| KY928904 | <i>Marmota himalayana</i> | CHN | 2013 |
| KY928905 | <i>Marmota himalayana</i> | CHN | 2013 |
| KY928906 | <i>Marmota himalayana</i> | CHN | 2013 |
| KY928907 | <i>Marmota himalayana</i> | CHN | 2013 |
| KY928908 | <i>Marmota himalayana</i> | CHN | 2013 |
| KY928909 | <i>Marmota himalayana</i> | CHN | 2013 |
| KY928910 | <i>Marmota himalayana</i> | CHN | 2013 |
| KY928911 | <i>Marmota himalayana</i> | CHN | 2013 |
| KY928912 | <i>Marmota himalayana</i> | CHN | 2013 |
| KY928913 | <i>Marmota himalayana</i> | CHN | 2013 |
| KY928914 | <i>Marmota himalayana</i> | CHN | 2013 |
| KY928915 | <i>Marmota himalayana</i> | CHN | 2013 |
| KY928916 | <i>Marmota himalayana</i> | CHN | 2013 |
| KY928917 | <i>Marmota himalayana</i> | CHN | 2013 |
| KY928918 | <i>Marmota himalayana</i> | CHN | 2013 |
| KY928919 | <i>Marmota himalayana</i> | CHN | 2013 |
| KY928920 | <i>Marmota himalayana</i> | CHN | 2013 |
| KY928921 | <i>Marmota himalayana</i> | CHN | 2013 |
| KY928922 | <i>Marmota himalayana</i> | CHN | 2013 |
| KY928923 | <i>Marmota himalayana</i> | CHN | 2013 |
| KY928924 | <i>Marmota himalayana</i> | CHN | 2013 |
| KY928925 | <i>Marmota himalayana</i> | CHN | 2013 |
| KY928926 | <i>Marmota himalayana</i> | CHN | 2013 |
| KY928927 | <i>Marmota himalayana</i> | CHN | 2013 |
| KY928928 | <i>Marmota himalayana</i> | CHN | 2013 |
| KY928929 | <i>Marmota himalayana</i> | CHN | 2013 |
| KY928930 | <i>Marmota himalayana</i> | CHN | 2013 |
| KY928931 | <i>Marmota himalayana</i> | CHN | 2013 |
| KY928932 | <i>Marmota himalayana</i> | CHN | 2013 |
| KY928933 | <i>Marmota himalayana</i> | CHN | 2013 |
| KY928934 | <i>Marmota himalayana</i> | CHN | 2013 |
| KY928935 | <i>Marmota himalayana</i> | CHN | 2013 |
| KY928936 | <i>Marmota himalayana</i> | CHN | 2013 |
| KY928937 | <i>Marmota himalayana</i> | CHN | 2013 |
| KY928938 | <i>Marmota himalayana</i> | CHN | 2013 |
| KY928939 | <i>Marmota himalayana</i> | CHN | 2013 |

|          |                           |     |      |
|----------|---------------------------|-----|------|
| KY928940 | <i>Marmota himalayana</i> | CHN | 2013 |
| KY928941 | <i>Marmota himalayana</i> | CHN | 2013 |
| KY928942 | <i>Marmota himalayana</i> | CHN | 2013 |
| KY928943 | <i>Marmota himalayana</i> | CHN | 2013 |
| KY928944 | <i>Marmota himalayana</i> | CHN | 2013 |
| KY928945 | <i>Marmota himalayana</i> | CHN | 2013 |
| KY928946 | <i>Marmota himalayana</i> | CHN | 2013 |
| KY928947 | <i>Marmota himalayana</i> | CHN | 2013 |
| KY928948 | <i>Marmota himalayana</i> | CHN | 2013 |
| KY928949 | <i>Marmota himalayana</i> | CHN | 2013 |
| KY928950 | <i>Marmota himalayana</i> | CHN | 2013 |
| KY928951 | <i>Marmota himalayana</i> | CHN | 2013 |
| KY928952 | <i>Marmota himalayana</i> | CHN | 2013 |
| KY928953 | <i>Marmota himalayana</i> | CHN | 2013 |
| KY928954 | <i>Marmota himalayana</i> | CHN | 2013 |
| KY928955 | <i>Marmota himalayana</i> | CHN | 2013 |
| KY928956 | <i>Marmota himalayana</i> | CHN | 2013 |
| KY928957 | <i>Marmota himalayana</i> | CHN | 2013 |
| KY928958 | <i>Marmota himalayana</i> | CHN | 2013 |
| KY928959 | <i>Marmota himalayana</i> | CHN | 2013 |
| KY928960 | <i>Marmota himalayana</i> | CHN | 2013 |
| KY928961 | <i>Marmota himalayana</i> | CHN | 2013 |
| KY928962 | <i>Marmota himalayana</i> | CHN | 2013 |
| KY928963 | <i>Marmota himalayana</i> | CHN | 2013 |
| KY928964 | <i>Marmota himalayana</i> | CHN | 2013 |
| KY928965 | <i>Marmota himalayana</i> | CHN | 2013 |
| KY928966 | <i>Marmota himalayana</i> | CHN | 2013 |
| KY928967 | <i>Marmota himalayana</i> | CHN | 2013 |
| KY928968 | <i>Marmota himalayana</i> | CHN | 2013 |
| KY928969 | <i>Marmota himalayana</i> | CHN | 2013 |
| KY928970 | <i>Marmota himalayana</i> | CHN | 2013 |
| KY928971 | <i>Marmota himalayana</i> | CHN | 2013 |
| KY928972 | <i>Marmota himalayana</i> | CHN | 2013 |
| KY928973 | <i>Marmota himalayana</i> | CHN | 2013 |
| KY928974 | <i>Marmota himalayana</i> | CHN | 2013 |
| KY928975 | <i>Marmota himalayana</i> | CHN | 2013 |
| KY928976 | <i>Marmota himalayana</i> | CHN | 2013 |
| KY928977 | <i>Marmota himalayana</i> | CHN | 2013 |
| KY928978 | <i>Marmota himalayana</i> | CHN | 2013 |



|          |                            |     |      |
|----------|----------------------------|-----|------|
| KY928979 | <i>Marmota himalayana</i>  | CHN | 2013 |
| KY928980 | <i>Marmota himalayana</i>  | CHN | 2013 |
| KY928981 | <i>Marmota himalayana</i>  | CHN | 2013 |
| KY928982 | <i>Marmota himalayana</i>  | CHN | 2013 |
| KY928983 | <i>Marmota himalayana</i>  | CHN | 2013 |
| KY928984 | <i>Marmota himalayana</i>  | CHN | 2013 |
| KY928985 | <i>Marmota himalayana</i>  | CHN | 2013 |
| KY928986 | <i>Marmota himalayana</i>  | CHN | 2013 |
| KY928987 | <i>Marmota himalayana</i>  | CHN | 2013 |
| KY928988 | <i>Marmota himalayana</i>  | CHN | 2013 |
| KY928989 | <i>Marmota himalayana</i>  | CHN | 2013 |
| KY928991 | <i>Marmota himalayana</i>  | CHN | 2013 |
| KY928992 | <i>Marmota himalayana</i>  | CHN | 2013 |
| KY928993 | <i>Marmota himalayana</i>  | CHN | 2013 |
| KY928994 | <i>Marmota himalayana</i>  | CHN | 2013 |
| KY928995 | <i>Marmota himalayana</i>  | CHN | 2013 |
| KY928996 | <i>Marmota himalayana</i>  | CHN | 2013 |
| KY928997 | <i>Marmota himalayana</i>  | CHN | 2013 |
| KY928998 | <i>Marmota himalayana</i>  | CHN | 2013 |
| KY928999 | <i>Marmota himalayana</i>  | CHN | 2013 |
| KY929000 | <i>Marmota himalayana</i>  | CHN | 2013 |
| KY929001 | <i>Marmota himalayana</i>  | CHN | 2013 |
| KY929002 | <i>Marmota himalayana</i>  | CHN | 2013 |
| KY929003 | <i>Marmota himalayana</i>  | CHN | 2013 |
| KY929005 | <i>Marmota himalayana</i>  | CHN | 2013 |
| KY929006 | <i>Marmota himalayana</i>  | CHN | 2013 |
| KY929007 | <i>Marmota himalayana</i>  | CHN | 2013 |
| KY929008 | <i>Marmota himalayana</i>  | CHN | 2013 |
| KY929009 | <i>Marmota himalayana</i>  | CHN | 2013 |
| KY929010 | <i>Marmota himalayana</i>  | CHN | 2013 |
| KY929011 | <i>Marmota himalayana</i>  | CHN | 2013 |
| KY929012 | <i>Marmota himalayana</i>  | CHN | 2013 |
| LC110352 | <i>Mus musculus</i>        | JPN | 2015 |
| LC337994 | <i>Camelus dromedaries</i> | ARE | 2013 |
| LC337995 | <i>Camelus dromedaries</i> | ARE | 2013 |
| LC337996 | <i>Camelus dromedaries</i> | ARE | 2013 |
| LC337997 | <i>Camelus dromedaries</i> | ARE | 2013 |
| LC337998 | <i>Camelus dromedaries</i> | ARE | 2013 |
| LC338000 | <i>Camelus dromedaries</i> | ARE | 2013 |

|          |                                    |     |      |
|----------|------------------------------------|-----|------|
| MG010885 | <i>Macaca mulatta</i>              | TCD | 2011 |
| MG010886 | <i>Macaca mulatta</i>              | TCD | 2011 |
| MG010887 | <i>Macaca mulatta</i>              | TCD | 2011 |
| MG010888 | <i>Macaca mulatta</i>              | TCD | 2011 |
| MG010889 | <i>Macaca mulatta</i>              | TCD | 2011 |
| MG010890 | <i>Macaca mulatta</i>              | TCD | 2011 |
| MG010891 | <i>Macaca mulatta</i>              | TCD | 2011 |
| MG010892 | <i>Macaca mulatta</i>              | TCD | 2011 |
| MG010893 | <i>Macaca mulatta</i>              | TCD | 2011 |
| MG010894 | <i>Macaca mulatta</i>              | TCD | 2011 |
| MG010895 | <i>Macaca mulatta</i>              | TCD | 2011 |
| MG010896 | <i>Macaca mulatta</i>              | TCD | 2011 |
| MG010898 | <i>Macaca mulatta</i>              | TCD | 2011 |
| MG190028 | <i>Roe deer</i>                    | SVN | 2014 |
| MG600063 | <i>Parupeneus cyclostomus</i>      | CHN | NA   |
| MG846392 | <i>Gallus gallus</i>               | BRA | 2015 |
| MG846393 | <i>Gallus gallus</i>               | BRA | 2015 |
| MG846395 | <i>Gallus gallus</i>               | BRA | 2015 |
| MG846396 | <i>Gallus gallus</i>               | BRA | 2015 |
| MG846397 | <i>Gallus gallus</i>               | BRA | 2015 |
| MG846398 | <i>Gallus gallus</i>               | BRA | 2015 |
| MG846399 | <i>Gallus gallus</i>               | BRA | 2015 |
| MG846400 | <i>Gallus gallus</i>               | BRA | 2015 |
| MH327933 | <i>Gallus gallus</i>               | HUN | 2011 |
| MH425579 | <i>Gallus gallus</i>               | HUN | 2013 |
| MH425580 | <i>Gallus gallus</i>               | HUN | 2013 |
| MH425581 | <i>Gallus gallus</i>               | HUN | 2013 |
| MH425582 | <i>Gallus gallus</i>               | HUN | 2013 |
| MH425583 | <i>Gallus gallus</i>               | HUN | 2013 |
| MH453876 | <i>Australian Shelduck</i>         | AUS | 2012 |
| MH453877 | <i>Australian Shelduck</i>         | AUS | 2012 |
| MK204399 | <i>Anas gracilis</i>               | AUS | 2017 |
| MK204419 | <i>Malacorhynchus membranaceus</i> | AUS | 2017 |
| MK305309 | <i>Homo sapiens</i>                | AGO | 2018 |
| MK378829 | <i>Sus scrofa</i>                  | CHN | 2004 |
| MK378842 | <i>Sus scrofa</i>                  | CHN | 2004 |
| MK378864 | <i>Sus scrofa</i>                  | CHN | 2004 |
| MN692670 | <i>Macaca fascicularis</i>         | THA | 2017 |
| MT846991 | <i>Pantholops hodgsonii</i>        | CHN | 2014 |

|           |                               |     |      |
|-----------|-------------------------------|-----|------|
| MT846992  | <i>Pantholops hodgsonii</i>   | CHN | 2014 |
| MT846993  | <i>Pantholops hodgsonii</i>   | CHN | 2014 |
| MT846994  | <i>Pantholops hodgsonii</i>   | CHN | 2014 |
| MT846995  | <i>Pantholops hodgsonii</i>   | CHN | 2014 |
| MT846996  | <i>Pantholops hodgsonii</i>   | CHN | 2014 |
| MT846997  | <i>Pantholops hodgsonii</i>   | CHN | 2014 |
| MT846998  | <i>Pantholops hodgsonii</i>   | CHN | 2014 |
| MT846999  | <i>Pantholops hodgsonii</i>   | CHN | 2014 |
| NC-029801 | <i>Sus scrofa</i>             | ITA | 2004 |
| NC-034160 | <i>Zalophus californianus</i> | AGO | 2008 |
| NC-040438 | <i>Gallus gallus</i>          | HUN | 2011 |
| NC-040752 | <i>Roe deer</i>               | SVN | 2014 |
| KC692367  | <i>Vulpes vulpes</i>          | NLD | 2012 |
| KY502844  | <i>Gorilla gorilla</i>        | COD | 2015 |
| AB186897  | NA                            | THA | NA   |

**Supplemental Table S2.** Capsid sequences of PBV used in the current study for phylogenetic analysis.

| Sample           | Virus                    | Virus reads | Bacteria                                    |
|------------------|--------------------------|-------------|---------------------------------------------|
| 1-sputum-4279    | -                        | -           | <i>Burkholderia</i>                         |
| 2-sputum-3406    | porcine picobirnavirus-3 | 2           | <i>Haemophilus</i>                          |
| 3-sputum-4940    | influenza A              | 8           | -                                           |
| 4-sputum-4942    | -                        | -           | -                                           |
| 5-sputum-4242    | -                        | -           | <i>Klebsiella, Stenotrophomonas</i>         |
| 6-sputum-4246    | -                        | -           | -                                           |
| 7-sputum-4256    | -                        | -           | <i>Acinetobacter, Klebsiella</i>            |
| 8-sputum-4366    | HHV-4                    | 79          | -                                           |
| 9-sputum-4352    | Aichivirus, HHV-4, HHV-7 | 65, 42, 61  | -                                           |
| 10-sputum-4946   | -                        | -           | -                                           |
| 11-sputum-4938   | HHV-1                    | 6045        | <i>Stenotrophomonas</i>                     |
| 12-sputum-4947   | HHV-1                    | 30          | -                                           |
| 13-sputum-4395   | -                        | -           | -                                           |
| 14-sputum-4418   | -                        | -           | -                                           |
| 15-sputum-4419   | -                        | -           | -                                           |
| Ctrl-sputum-3405 | HHV-4                    | 30          | <i>Acinetobacter, Neisseria, Klebsiella</i> |

**Supplemental Table S3. Viral and bacterial infections detected in primary screen.** 16 sputum samples from individuals in Colombia were sequenced by mNGS. Viral species (read numbers listed) and bacterial genera enriched are listed. (-): nothing detected.

| Analysis      | Statistic    | IR(CI95%)                                           | Observed mean (CI 95%)               | Expected mean (CI95%) | Significance |
|---------------|--------------|-----------------------------------------------------|--------------------------------------|-----------------------|--------------|
| <b>RdRp</b>   | AI           | 0.14 (0.11-0.19)                                    | 0.27 (0.25-0.28)                     | 1.90 (1.32-2.44)      | <0.0001      |
|               | PS           | 0.22 (0.22-0.25)                                    | 2.00 (2.00-2.00)                     | 8.92 (8.04-9.00)      | <0.0001      |
|               | MC (Non-CRC) | ND                                                  | 216.50 (213.0-219.0)                 | 71.78 (36.00-103.0)   | <0.001       |
|               | MC (CRC)     | ND                                                  | 4.20 (4.00-6.00)                     | 1.05 (1.00-1.35)      | <0.001       |
| <b>Capsid</b> | AI           | $1.9 \times 10^{-4}$ ( $0.3 \times 10^{-7}$ -0.003) | 0.001 ( $1.3 \times 10^{-7}$ -0.002) | 5.3 (4.39-6.16)       | <0.0001      |
|               | PS           | 0.08 (0.09-0.08)                                    | 2 (2.0-2.0)                          | 24.48 (23.17-25.0)    | <0.0001      |
|               | MC (Non-CRC) | ND                                                  | 112.98 (78.0-126.0)                  | 36.19 (23.46-58.0)    | 0.001        |
|               | MC (CRC)     | ND                                                  | 19.0 (19.0-19.0)                     | 1.38 (1.0-2.0)        | <0.0001      |

**Supplemental Table S4.** Phylogeny-trait association tests of the clinical condition structure (CRC) of PBV RdRp and capsid coding sequences using BaTS.
